# Supplementary material for: Possible high-pressure structures of sulfur trioxideElectronic supplementary information (ESI) available: technical details for calculations. See http://www.rsc.org/suppdata/cc/b1/b107778c/
Source: Royal Society of Chemistry journal article supplement (doi:10.1039/b107778c), 2002-01-31
Supplement: b107778c.doc [file b107778c.doc]

Supplementary information to the communication by Tamm and Pyykkö,

"Possible high-pressure structures of sulphur trioxide".

Technical details for calculation.

The Wien97 program package (http://info.tuwien.ac.at/theochem/) was used for the calculations. Program parameters were left at default values unless otherwise mentioned below.

The selected density functional was the GGA of Perdew-Burke-Ernzerhof 96. The states below -6.0 Ry\footnote{1 Rydberg = 1312.75 kJ/mol} were treated as core ones. The muffin-tin radii ($R_{mt}$) were chosen as 1.27 a.u.\ for both O and S. Most calculations employed 25 k-points in the Brillouin zone. Convergence was tested with up to 1000 k-points for selected systems. Plane-wave cutoff ($R_{mt}\cdot K_{max}$) was set at 6.5 Ry. The energy is not fully converged at this level, but the energy differences were found to be sufficiently converged for the present study. The choice was dictated by available computer

resources.
